# Supplementary material for: Efficient improvement in non-enzymatic glucose detection induced by the hollow prism-like NiCo2S4 electrocatalyst
Source: Royal Society of Chemistry journal article supplement (doi:10.1039/d1dt02371c), 2021-01-01
Supplement: d1dt02371c1.pdf [file d1dt02371c1.pdf]

## Efficient improvement in non-enzymatic glucose detection induced by the hollow prism-like NiCo<sub>2</sub>S<sub>4</sub> electrocatalyst

Dandan Chu, Li Yan, Qiwen Chen, Xue-Qiang Chu, Danhua Ge,\* Xiaojun Chen\*

College of Chemistry and Molecular Engineering, Nanjing Tech University, Nanjing, 211800, PR China.

E-mail: [chenxj@njtech.edu.cn](mailto:chenxj@njtech.edu.cn).

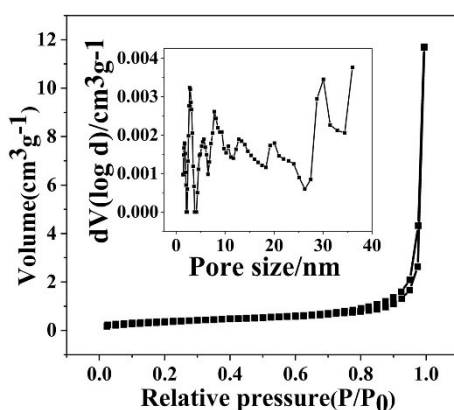

**Fig. S1** N<sub>2</sub> adsorption-desorption isotherm of NiCo<sub>2</sub>S<sub>4</sub> nanoprisms, Inset: the pore size distribution curve of NiCo<sub>2</sub>S<sub>4</sub> HNPs.

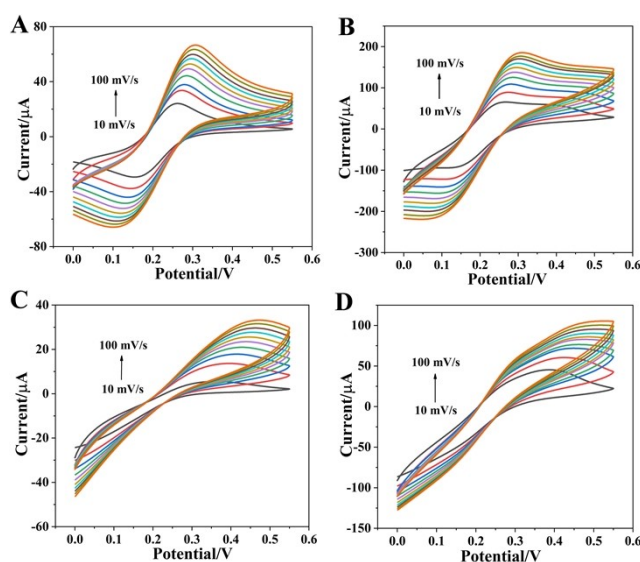

**Fig. S2** The scan rate study of NiCo<sub>2</sub>S<sub>4</sub> electrodes annealed at 350 °C for 1, 2, 3 and 4h in 0.1 M KCl solution containing 5 mM K<sub>3</sub>[Fe(CN)<sub>6</sub>].

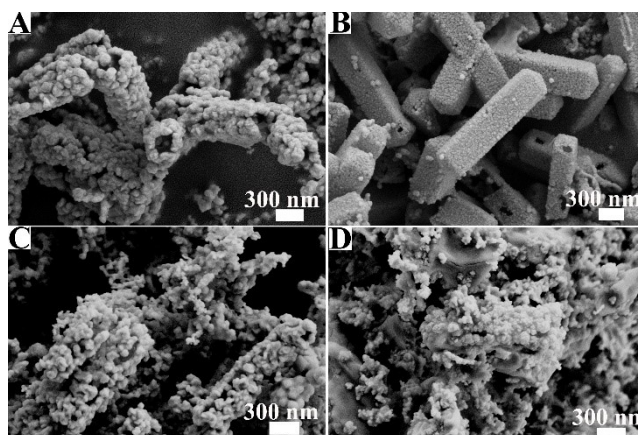

**Fig. S3** SEM images of samples for different calcination time: (A) 1h, (B) 2h (C) 3h and (D) 4h.

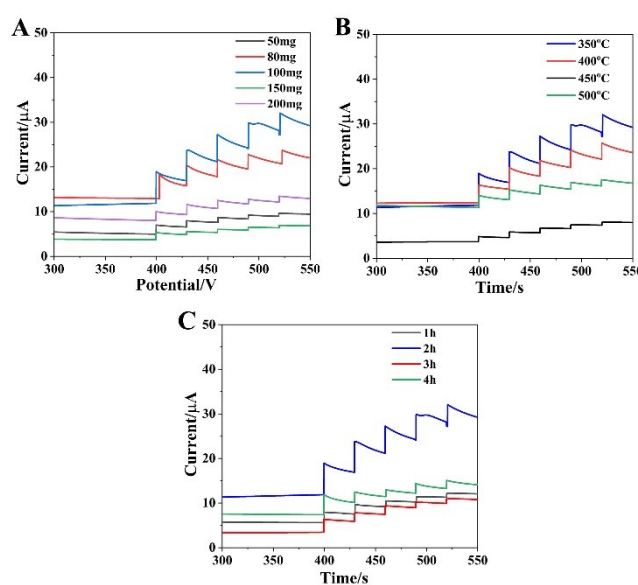

**Fig. S4** Current-time (i-t) curves of (A) Co/Ni precursor with different amounts of TAA, (B) under different calcination temperature and (C) treated by different holding time at 0.55 V in 0.2 M NaOH with successive addition of 1 mM of glucose.

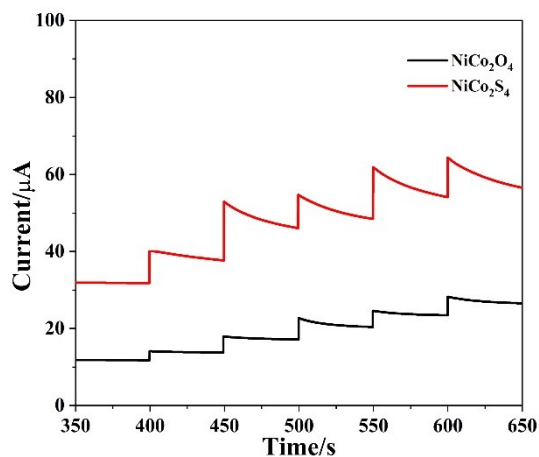

**Fig. S5** Current-time (i-t) curves of  $\text{NiCo}_2\text{O}_4$  and  $\text{NiCo}_2\text{S}_4$  modified electrodes at 0.55 V in 0.2 M NaOH with successive addition of 1 mM of glucose.

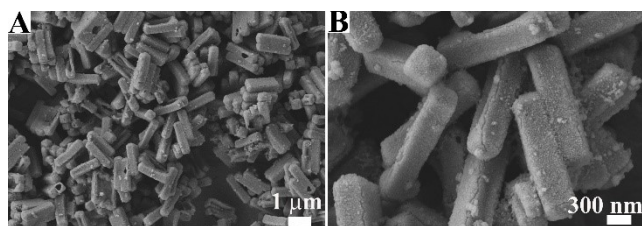

**Fig. S6** SEM images of NiCo<sub>2</sub>S<sub>4</sub> modified electrodes after electrocatalysis.

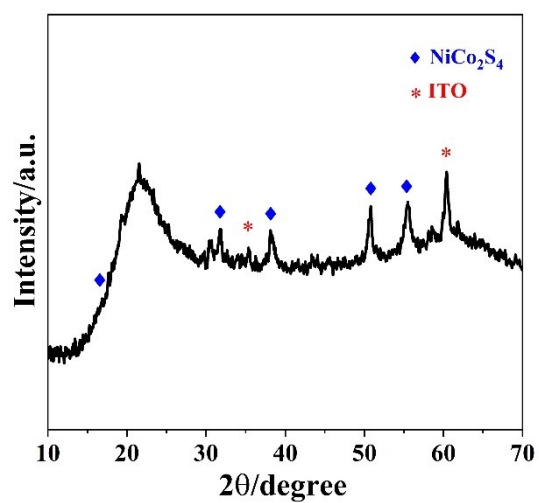

**Fig. S7** XRD pattern of NiCo<sub>2</sub>S<sub>4</sub> modified electrodes after electrocatalysis.
